# Supplementary material
Source: PubMed Central journal article supplement (PMC11221687)

**Cervical****Middle****Tip****Sample 1**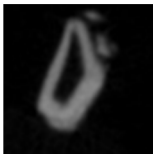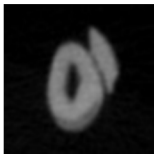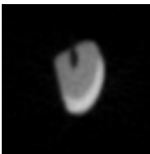**Sample 2**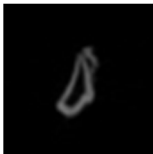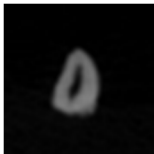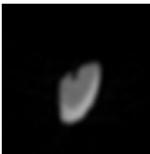**Sample 3**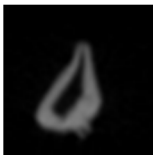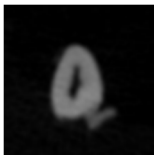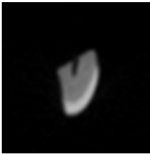**Sample 4**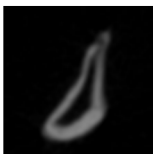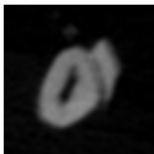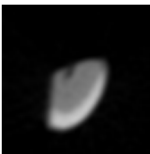**Sample 5**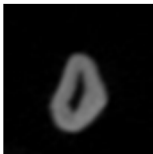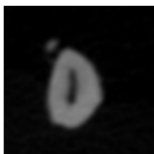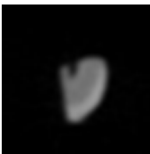

Supplement: NIHMS1998745-supplement-supplementary_figure.pdf [file NIHMS1998745-supplement-supplementary_figure.pdf]
